# Supplementary material
Source: PubMed Central journal article supplement (PMC3903230)
Supplement: 1317535111_pnas.201317535SI.pdf [file 1317535111_pnas.201317535SI.pdf]

# Supporting Information

Zheng et al. 10.1073/pnas.1317535111

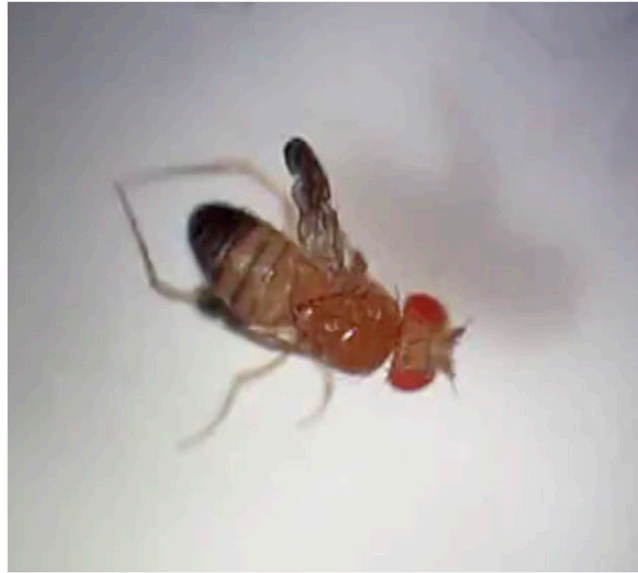

**Movie S1.** Movement of Sas-4 $\Delta$ TCP in *sas-4* null.

[Movie S1](#)

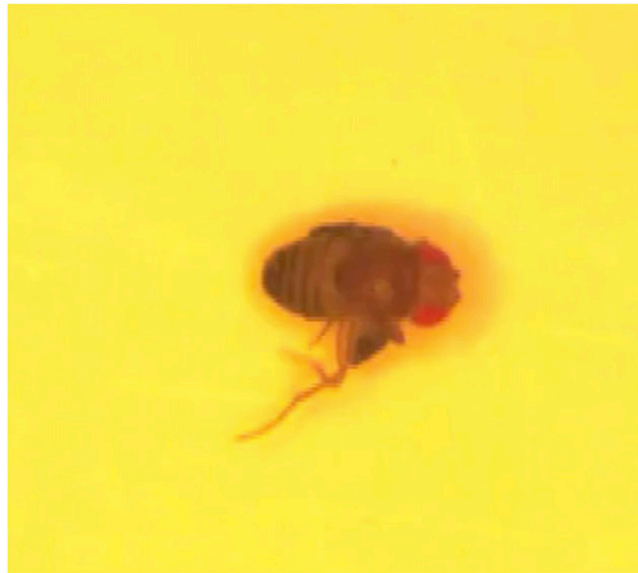

**Movie S2.** Movement of Sas-4-TCP-1 variant in *sas-4* null.

[Movie S2](#)

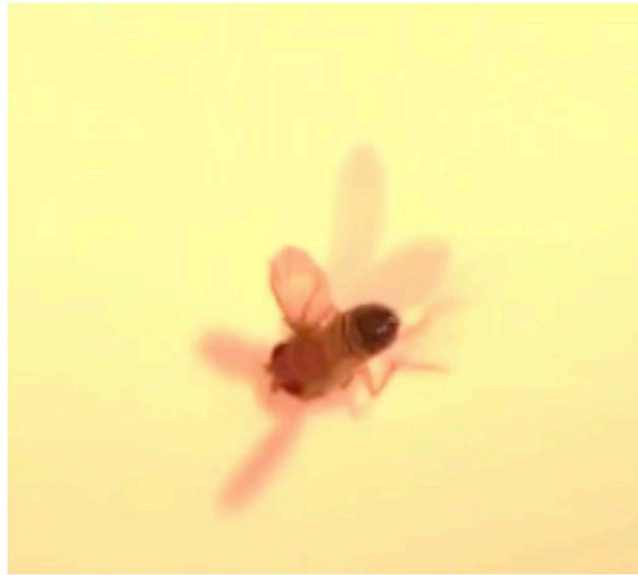

**Movie S3.** Movement of Sas-4-TCP-2 variant in *sas-4* null.

[Movie S3](#)

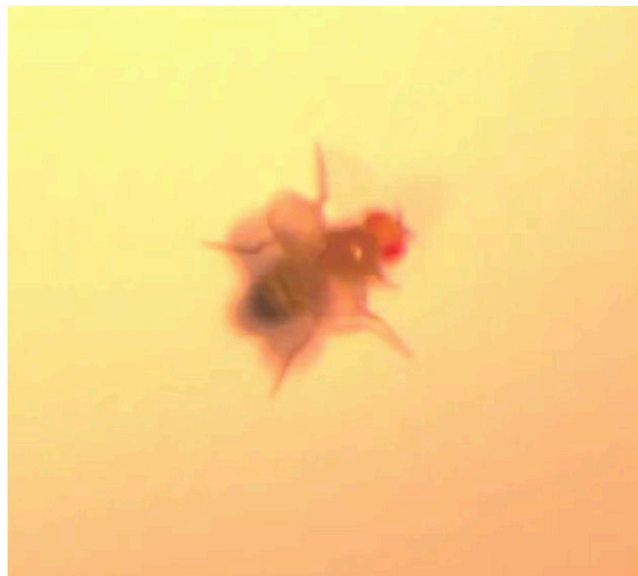

**Movie S4.** Movement of Sas-4-TCP-3 variant in *sas-4* null.

[Movie S4](#)

## Other Supporting Information Files

[SI Appendix \(PDF\)](#)
